# Supplementary material
Source: PubMed Central journal article supplement (PMC3568986)
Supplement: NIHMS390503-supplement-1_si_001.pdf [file NIHMS390503-supplement-1_si_001.pdf]

Supporting Information  
Fig. S1

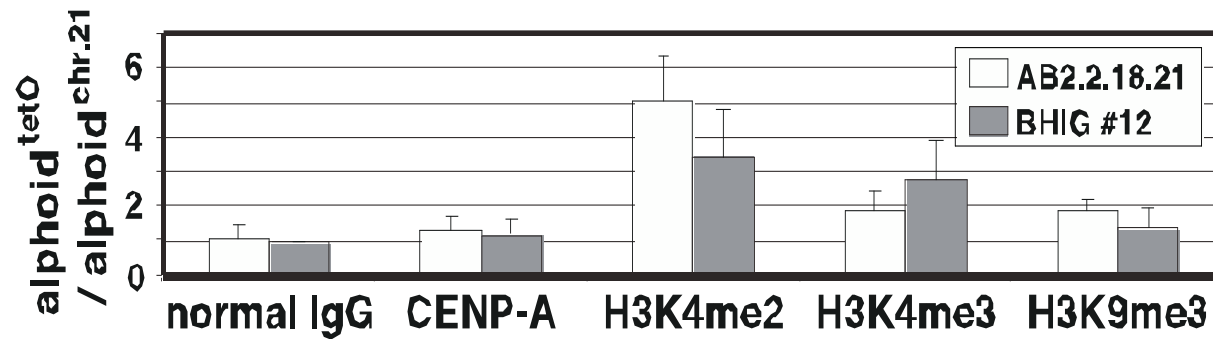

**Figure S1.** Comparison of the enrichment of tetO-alphaoid DNA and the endogenous chromosome 21 alphaoid DNA by CENP-A, H3K4me2, H3K4me3 in BHIG#12 and AB2.2.18.21 cells. Calculations of the ratio between IPed tetO-alphaoid DNA in the HAC and IPed endogenous chromosome 21 alphaoid DNA has been carried out for each cell line. As seen on the graph, a relative enrichment of CENP-A, H3K4me2, H3K4me3 and H3K9me3 on tetO-alphaoid DNAs in BHIG#12 cells is not different from that observed in AB2.2.18.21 cells. All p-values were larger than 0.05. This indicates that kinetochore regions in the HAC did not change after multiple steps of HAC transfer via MMCT.

Supporting Information  
Fig. S2

a

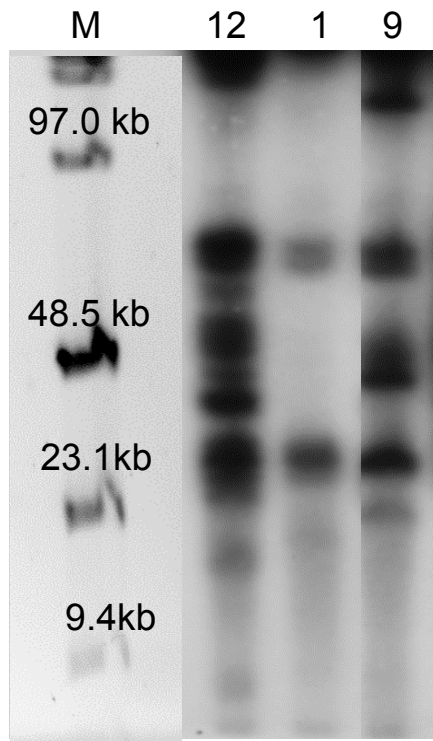

b

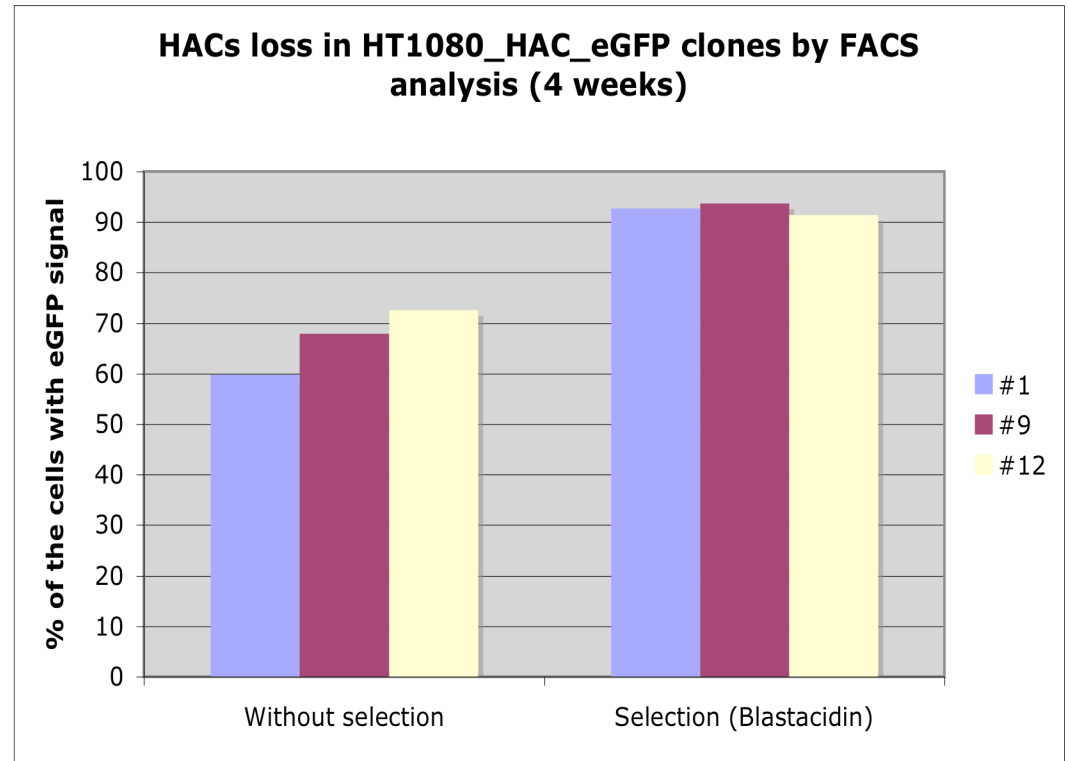

**Figure S2.** Analysis of the deleted forms of  $\text{alphoid}^{\text{tetO}}$ -HAC obtained during MMCT transfer from hamster CHO to human HT1080 cells. (a) Southern blot analysis of three HAC-containing HT1080 clones. Genomic DNA possessing the HAC was digested with *SpeI* endonuclease and separated by CHEF gel electrophoresis (range 10-70 kb). The transferred membranes were hybridized with the tetO- $\text{alphoid}$  probe. Lane 1 - BHIG#12 clone containing the HAC with the 1.1 Mb original  $\text{alphoid}$  array; lane 2 - BHIG#1 clone containing the HAC with a deleted array (400 kb); lane 3 - BHIG#9 clone containing the HAC with a deleted array (800 kb). M - Pulse Markers. (b) Stability of HACs. Each HAC contains the *EGFP* gene. Mitotic stability of the HACs was determined by FACS as described previously (1).

Reference

1. Kim J-H, Ebersole T, Kouprina N et al. Human pericentromeric gamma-satellite DNA maintains open chromatin structure and protects a transgene from epigenetic silencing at an ectopic site. *Genome Res.* 2009 19:533-544.
